# Supplementary material for: Long Noncoding RNA KCNMB2-AS1 Stabilized by N6-Methyladenosine Modification Promotes Cervical Cancer Growth Through Acting as a Competing Endogenous RNA
Source: PubMed Central journal article supplement — Cell Transplant. 2020 Oct 7;29:0963689720964382. doi: 10.1177/0963689720964382 (PMC7784579; doi:10.1177/0963689720964382), 2020-10-07
Supplement: Figure_S1.pdf [file Figure_S1.pdf]

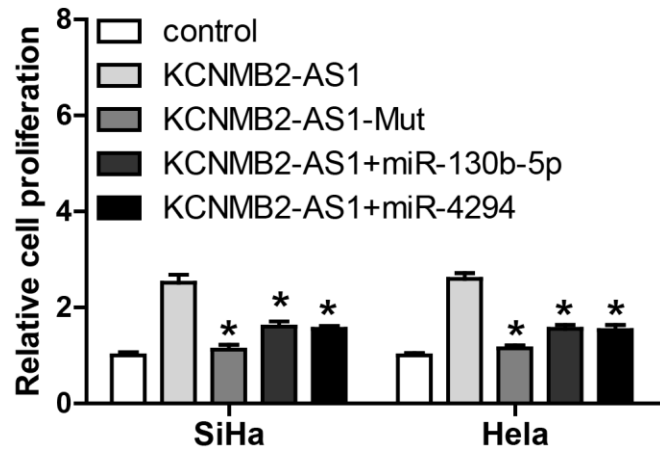

Figure S1. Analysis of CC cell proliferation after transfection with wild-type or mutant KCNMB2-AS1 overexpression vector, or co-transfection with wild-type KCNMB2-AS1 overexpression vector and miR-130b-5p/miR-4294 mimics.
